# Supplementary material
Source: publisher figshare collection journal article supplement (https://acs.figshare.com/ndownloader/files/3865477)
Supplement: Supplementary file 1 [file 3865477]

 
data_shelxl
 
_audit_creation_method            SHELXL-97
_chemical_name_systematic
;
 ?
;
_chemical_name_common             ?
_chemical_melting_point           ?
_chemical_formula_moiety          ?
_chemical_formula_sum
 'C18 H10 Ag2 Fe N8 O0.50'
_chemical_formula_weight          617.93
 
loop_
 _atom_type_symbol
 _atom_type_description
 _atom_type_scat_dispersion_real
 _atom_type_scat_dispersion_imag
 _atom_type_scat_source
 'C'  'C'   0.0033   0.0016
 'International Tables Vol C Tables 4.2.6.8 and 6.1.1.4'
 'H'  'H'   0.0000   0.0000
 'International Tables Vol C Tables 4.2.6.8 and 6.1.1.4'
 'N'  'N'   0.0061   0.0033
 'International Tables Vol C Tables 4.2.6.8 and 6.1.1.4'
 'Fe'  'Fe'   0.3463   0.8444
 'International Tables Vol C Tables 4.2.6.8 and 6.1.1.4'
 'Ag'  'Ag'  -0.8971   1.1015
 'International Tables Vol C Tables 4.2.6.8 and 6.1.1.4'
 'O'  'O'   0.0106   0.0060
 'International Tables Vol C Tables 4.2.6.8 and 6.1.1.4'
 
_symmetry_cell_setting            trigonal
_symmetry_space_group_name_H-M    R-3m
 
loop_
 _symmetry_equiv_pos_as_xyz
 'x, y, z'
 '-y, x-y, z'
 '-x+y, -x, z'
 'x-y, -y, -z'
 '-x, -x+y, -z'
 'y, x, -z'
 'x+2/3, y+1/3, z+1/3'
 '-y+2/3, x-y+1/3, z+1/3'
 '-x+y+2/3, -x+1/3, z+1/3'
 'x-y+2/3, -y+1/3, -z+1/3'
 '-x+2/3, -x+y+1/3, -z+1/3'
 'y+2/3, x+1/3, -z+1/3'
 'x+1/3, y+2/3, z+2/3'
 '-y+1/3, x-y+2/3, z+2/3'
 '-x+y+1/3, -x+2/3, z+2/3'
 'x-y+1/3, -y+2/3, -z+2/3'
 '-x+1/3, -x+y+2/3, -z+2/3'
 'y+1/3, x+2/3, -z+2/3'
 '-x, -y, -z'
 'y, -x+y, -z'
 'x-y, x, -z'
 '-x+y, y, z'
 'x, x-y, z'
 '-y, -x, z'
 '-x+2/3, -y+1/3, -z+1/3'
 'y+2/3, -x+y+1/3, -z+1/3'
 'x-y+2/3, x+1/3, -z+1/3'
 '-x+y+2/3, y+1/3, z+1/3'
 'x+2/3, x-y+1/3, z+1/3'
 '-y+2/3, -x+1/3, z+1/3'
 '-x+1/3, -y+2/3, -z+2/3'
 'y+1/3, -x+y+2/3, -z+2/3'
 'x-y+1/3, x+2/3, -z+2/3'
 '-x+y+1/3, y+2/3, z+2/3'
 'x+1/3, x-y+2/3, z+2/3'
 '-y+1/3, -x+2/3, z+2/3'
 
_cell_length_a                    26.2174(12)
_cell_length_b                    26.2174(12)
_cell_length_c                    9.5734(5)
_cell_angle_alpha                 90.00
_cell_angle_beta                  90.00
_cell_angle_gamma                 120.00
_cell_volume                      5698.7(5)
_cell_formula_units_Z             9
_cell_measurement_temperature     120(1)
_cell_measurement_reflns_used     100
_cell_measurement_theta_min       12
_cell_measurement_theta_max       20
 
_exptl_crystal_description        prismatic
_exptl_crystal_colour             red
_exptl_crystal_size_max           0.15
_exptl_crystal_size_mid           0.15
_exptl_crystal_size_min           0.08
_exptl_crystal_density_meas       ?
_exptl_crystal_density_diffrn     1.621
_exptl_crystal_density_method     'not measured'
_exptl_crystal_F_000              2682
_exptl_absorpt_coefficient_mu     2.116
_exptl_absorpt_correction_type    empirical
_exptl_absorpt_correction_T_min   0.7420
_exptl_absorpt_correction_T_max   0.8490
_exptl_absorpt_process_details    'Empirical absorption correction:XABS2'
 
_exptl_special_details
;
 ?
;
 
_diffrn_ambient_temperature       120(1)
_diffrn_radiation_wavelength      0.71069
_diffrn_radiation_type            MoK\a
_diffrn_radiation_source          'fine-focus sealed tube'
_diffrn_radiation_monochromator   graphite
_diffrn_measurement_device_type   ?
_diffrn_measurement_method        ?
_diffrn_detector_area_resol_mean  ?
_diffrn_standards_number          ?
_diffrn_standards_interval_count  ?
_diffrn_standards_interval_time   ?
_diffrn_standards_decay_%         ?
_diffrn_reflns_number             12205
_diffrn_reflns_av_R_equivalents   0.0364
_diffrn_reflns_av_sigmaI/netI     0.0285
_diffrn_reflns_limit_h_min        -32
_diffrn_reflns_limit_h_max        37
_diffrn_reflns_limit_k_min        -36
_diffrn_reflns_limit_k_max        36
_diffrn_reflns_limit_l_min        -14
_diffrn_reflns_limit_l_max        14
_diffrn_reflns_theta_min          3.19
_diffrn_reflns_theta_max          32.43
_reflns_number_total              2273
_reflns_number_gt                 1840
_reflns_threshold_expression      >2sigma(I)
 
_computing_data_collection        'COLLECT'
_computing_cell_refinement        'HKL DENZO'
_computing_data_reduction         'HKL DENZO and SCALEPACK'
_computing_structure_solution     'SHELXS-97'
_computing_structure_refinement   'SHELXL-97 (Sheldrick, 2008)'
_computing_molecular_graphics     ?
_computing_publication_material   ?
 
_refine_special_details
;
 Refinement of F^2^ against ALL reflections.  The weighted R-factor wR and
 goodness of fit S are based on F^2^, conventional R-factors R are based
 on F, with F set to zero for negative F^2^. The threshold expression of
 F^2^ > 2sigma(F^2^) is used only for calculating R-factors(gt) etc. and is
 not relevant to the choice of reflections for refinement.  R-factors based
 on F^2^ are statistically about twice as large as those based on F, and R-
 factors based on ALL data will be even larger.
;
 
_refine_ls_structure_factor_coef  Fsqd
_refine_ls_matrix_type            full
_refine_ls_weighting_scheme       calc
_refine_ls_weighting_details
 'calc w=1/[\s^2^(Fo^2^)+(0.1148P)^2^+56.2195P] where P=(Fo^2^+2Fc^2^)/3'
_atom_sites_solution_primary      direct
_atom_sites_solution_secondary    difmap
_atom_sites_solution_hydrogens    geom
_refine_ls_hydrogen_treatment     mixed
_refine_ls_extinction_method      none
_refine_ls_extinction_coef        ?
_refine_ls_number_reflns          2273
_refine_ls_number_parameters      81
_refine_ls_number_restraints      1
_refine_ls_R_factor_all           0.0756
_refine_ls_R_factor_gt            0.0600
_refine_ls_wR_factor_ref          0.1933
_refine_ls_wR_factor_gt           0.1713
_refine_ls_goodness_of_fit_ref    1.081
_refine_ls_restrained_S_all       1.081
_refine_ls_shift/su_max           0.010
_refine_ls_shift/su_mean          0.001
 
loop_
 _atom_site_label
 _atom_site_type_symbol
 _atom_site_fract_x
 _atom_site_fract_y
 _atom_site_fract_z
 _atom_site_U_iso_or_equiv
 _atom_site_adp_type
 _atom_site_occupancy
 _atom_site_symmetry_multiplicity
 _atom_site_calc_flag
 _atom_site_refinement_flags
 _atom_site_disorder_assembly
 _atom_site_disorder_group
O1 O 0.2057(5) 0.7943(5) 0.902(2) 0.034(4) Uiso 0.25 2 d SP . .
C6 C 0.2565(9) 0.8307(10) 0.838(2) 0.032(4) Uiso 0.25 1 d P . .
C7 C 0.2602(8) 0.7970(8) 0.722(3) 0.060(7) Uiso 0.25 1 d PD . .
Ag Ag 0.3333 0.96593(2) 0.6667 0.0340(2) Uani 1 2 d S . .
Fe Fe 0.5000 1.0000 1.0000 0.0169(3) Uani 1 4 d S . .
N1 N 0.54387(11) 1.0877(2) 0.9944(5) 0.0194(8) Uani 1 2 d S . .
N2 N 0.44566(16) 0.99845(16) 0.8587(4) 0.0230(7) Uani 1 1 d . . .
N3 N 0.6059(2) 1.30297(12) 0.9990(5) 0.0224(9) Uani 1 2 d S . .
C1 C 0.60326(18) 1.11858(18) 0.9938(5) 0.0230(7) Uani 1 1 d . . .
H1 H 0.6235 1.0979 0.9921 0.028 Uiso 1 1 calc R . .
C2 C 0.63551(19) 1.17955(18) 0.9957(5) 0.0245(8) Uani 1 1 d . . .
H2 H 0.6765 1.1993 0.9962 0.029 Uiso 1 1 calc R . .
C3 C 0.60527(13) 1.2105(3) 0.9966(8) 0.0264(12) Uani 1 2 d S . .
C4 C 0.63805(12) 1.2761(2) 0.9996(7) 0.0224(10) Uani 1 2 d S . .
C5 C 0.4081(2) 0.9934(2) 0.7859(5) 0.0299(9) Uani 1 1 d . . .
 
loop_
 _atom_site_aniso_label
 _atom_site_aniso_U_11
 _atom_site_aniso_U_22
 _atom_site_aniso_U_33
 _atom_site_aniso_U_23
 _atom_site_aniso_U_13
 _atom_site_aniso_U_12
Ag 0.0232(3) 0.0330(3) 0.0425(3) -0.00775(9) -0.01549(19) 0.01161(14)
Fe 0.0108(3) 0.0130(5) 0.0277(5) -0.0064(4) -0.00322(18) 0.0065(2)
N1 0.0134(14) 0.016(2) 0.030(2) -0.0045(16) -0.0022(8) 0.0080(10)
N2 0.0179(15) 0.0198(15) 0.0316(16) -0.0065(12) -0.0060(12) 0.0096(13)
N3 0.016(2) 0.0148(15) 0.036(2) -0.0005(9) -0.0010(17) 0.0082(10)
C1 0.0144(16) 0.0152(16) 0.041(2) -0.0003(15) 0.0009(14) 0.0084(14)
C2 0.0144(16) 0.0169(17) 0.043(2) -0.0012(15) -0.0002(15) 0.0081(14)
C3 0.0159(18) 0.014(2) 0.049(3) -0.001(2) -0.0006(11) 0.0069(12)
C4 0.0152(17) 0.012(2) 0.039(3) 0.000(2) -0.0001(10) 0.0062(11)
C5 0.025(2) 0.026(2) 0.038(2) -0.0085(17) -0.0088(17) 0.0124(18)
 
_geom_special_details
;
 All esds (except the esd in the dihedral angle between two l.s. planes)
 are estimated using the full covariance matrix.  The cell esds are taken
 into account individually in the estimation of esds in distances, angles
 and torsion angles; correlations between esds in cell parameters are only
 used when they are defined by crystal symmetry.  An approximate (isotropic)
 treatment of cell esds is used for estimating esds involving l.s. planes.
;
 
loop_
 _geom_bond_atom_site_label_1
 _geom_bond_atom_site_label_2
 _geom_bond_distance
 _geom_bond_site_symmetry_2
 _geom_bond_publ_flag
O1 C6 1.34(2) 24_665 ?
O1 C6 1.34(2) . ?
C6 C7 1.46(4) . ?
C7 C7 1.499(10) 24_665 ?
Ag C5 2.063(5) . ?
Ag C5 2.063(5) 11_556 ?
Fe N2 1.950(4) 19_677 ?
Fe N2 1.950(4) . ?
Fe N2 1.950(4) 22 ?
Fe N2 1.950(4) 4_677 ?
Fe N1 1.993(5) . ?
Fe N1 1.993(5) 19_677 ?
N1 C1 1.349(5) . ?
N1 C1 1.349(5) 22 ?
N2 C5 1.158(6) . ?
N3 C4 1.341(4) . ?
N3 C4 1.341(4) 3_575 ?
C1 C2 1.385(6) . ?
C1 H1 0.9300 . ?
C2 C3 1.391(5) . ?
C2 H2 0.9300 . ?
C3 C2 1.390(5) 22 ?
C3 C4 1.489(8) . ?
C4 N3 1.341(4) 2_775 ?
 
loop_
 _geom_angle_atom_site_label_1
 _geom_angle_atom_site_label_2
 _geom_angle_atom_site_label_3
 _geom_angle
 _geom_angle_site_symmetry_1
 _geom_angle_site_symmetry_3
 _geom_angle_publ_flag
C6 O1 C6 118(2) 24_665 . ?
C6 C7 C7 105.7(9) . 24_665 ?
O1 C6 C7 105.1(17) . . ?
C5 Ag C5 165.6(3) . 11_556 ?
N2 Fe N2 180.000(1) 19_677 . ?
N2 Fe N2 87.9(2) 19_677 22 ?
N2 Fe N2 92.1(2) . 22 ?
N2 Fe N2 92.1(2) 19_677 4_677 ?
N2 Fe N2 87.9(2) . 4_677 ?
N2 Fe N2 180.000(1) 22 4_677 ?
N2 Fe N1 90.03(15) 19_677 . ?
N2 Fe N1 89.97(15) . . ?
N2 Fe N1 89.97(15) 22 . ?
N2 Fe N1 90.03(15) 4_677 . ?
N2 Fe N1 89.97(15) 19_677 19_677 ?
N2 Fe N1 90.03(15) . 19_677 ?
N2 Fe N1 90.03(15) 22 19_677 ?
N2 Fe N1 89.97(15) 4_677 19_677 ?
N1 Fe N1 180.0 . 19_677 ?
C1 N1 C1 117.4(5) . 22 ?
C1 N1 Fe 121.3(2) . . ?
C1 N1 Fe 121.3(2) 22 . ?
C5 N2 Fe 171.9(4) . . ?
C4 N3 C4 114.1(6) . 3_575 ?
N1 C1 C2 123.2(4) . . ?
N1 C1 H1 118.4 . . ?
C2 C1 H1 118.4 . . ?
C1 C2 C3 118.5(4) . . ?
C1 C2 H2 120.8 . . ?
C3 C2 H2 120.8 . . ?
C2 C3 C2 119.2(5) . 22 ?
C2 C3 C4 120.4(3) . . ?
C2 C3 C4 120.4(3) 22 . ?
N3 C4 N3 125.9(6) . 2_775 ?
N3 C4 C3 117.1(3) . . ?
N3 C4 C3 117.1(3) 2_775 . ?
N2 C5 Ag 167.9(4) . . ?
 
_diffrn_measured_fraction_theta_max    0.939
_diffrn_reflns_theta_full              25.00
_diffrn_measured_fraction_theta_full   0.986
_refine_diff_density_max    1.552
_refine_diff_density_min   -1.082
_refine_diff_density_rms    0.233
